# Supplementary material
Source: publisher site journal article supplement (https://www.spandidos-publications.com/6803/downloadSupplementary)
Supplement: Supplementary file 1 [file downloadSupplementary]

## Sheet: Sheet1
Table SX. GO annotation analysis of cellular components for targets of upregulated piwi-interacting RNAs.
Term	Overlap	P-value	Adjusted P-value	Odds Ratio	Combined Score	Genes
Polysomal Ribosome (GO:0042788)	46753	0.0139151	0.048146	82.1523	351.183	RPL41
Large Ribosomal Subunit (GO:0015934)	18994	0.0257034	0.048146	43.4401	159.04	RPL41
Cytosolic Large Ribosomal Subunit (GO:0022625)	18994	0.0257034	0.048146	43.4401	159.04	RPL41
Vacuolar Membrane (GO:0005774)	21551	0.0291177	0.048146	38.1839	135.034	SLC36A3
Ribosome (GO:0005840)	22282	0.0300913	0.048146	36.9074	129.306	RPL41
Mitochondrial Matrix (GO:0005759)	1/355	0.164006	0.218675	6.16321	11.1422	GCDH
Bounding Membrane Of Organelle (GO:0098588)	1/819	0.34178	0.35437	2.60418	2.79582	SLC36A3
Intracellular Organelle Lumen (GO:0070013)	1/856	0.35437	0.35437	2.48668	2.57971	GCDH
